# Supplementary material for: Boron uptake, localization, and speciation in marine brown algae
Source: Royal Society of Chemistry journal article supplement (doi:10.1039/c5mt00238a), 2015-12-02
Supplement: c5mt00238a1.pdf [file c5mt00238a1.pdf]

## **Supplementary Information**

### **Boron Uptake, Localization, and Speciation in Marine Brown Algae**

Eric P. Miller<sup>1</sup>, Youxian Wu<sup>2</sup>, and Carl J. Carrano<sup>1</sup>

<sup>1</sup>Department of Chemistry and Biochemistry  
and

<sup>2</sup>Department of Civil, Construction, and Environmental Engineering  
San Diego State University  
San Diego, CA 92182-1030

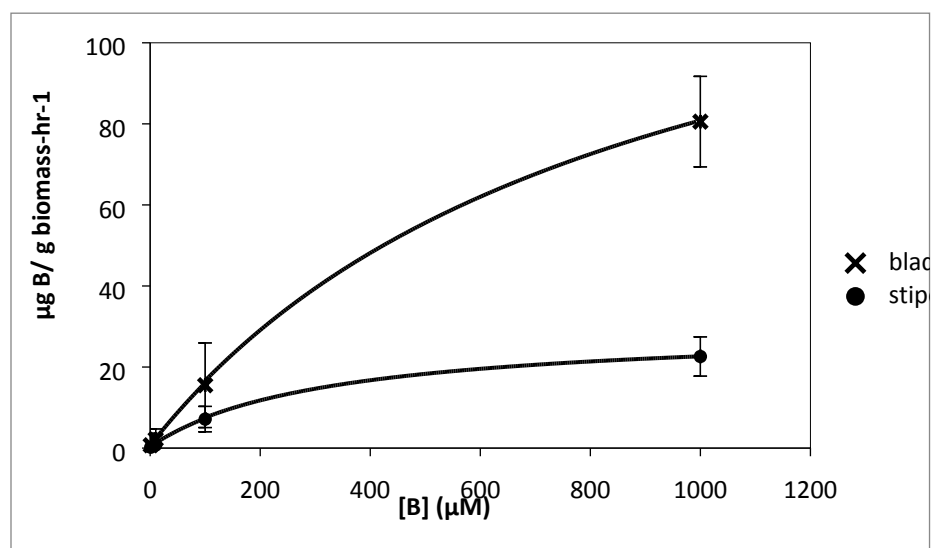

Figure S1. Uptake of boron by *Macrocyctis* blade (upper) after two hour incubation and stipe (lower) after four hour incubation in ASW medium as a function of boron concentration. Data points are shown as open circles (blade) or closed circles (stipe) while the solid line represents fits to the data as described in the text. Error bars represent  $\pm 1$  S.D. from duplicate experiments with replicate concentration points for each.

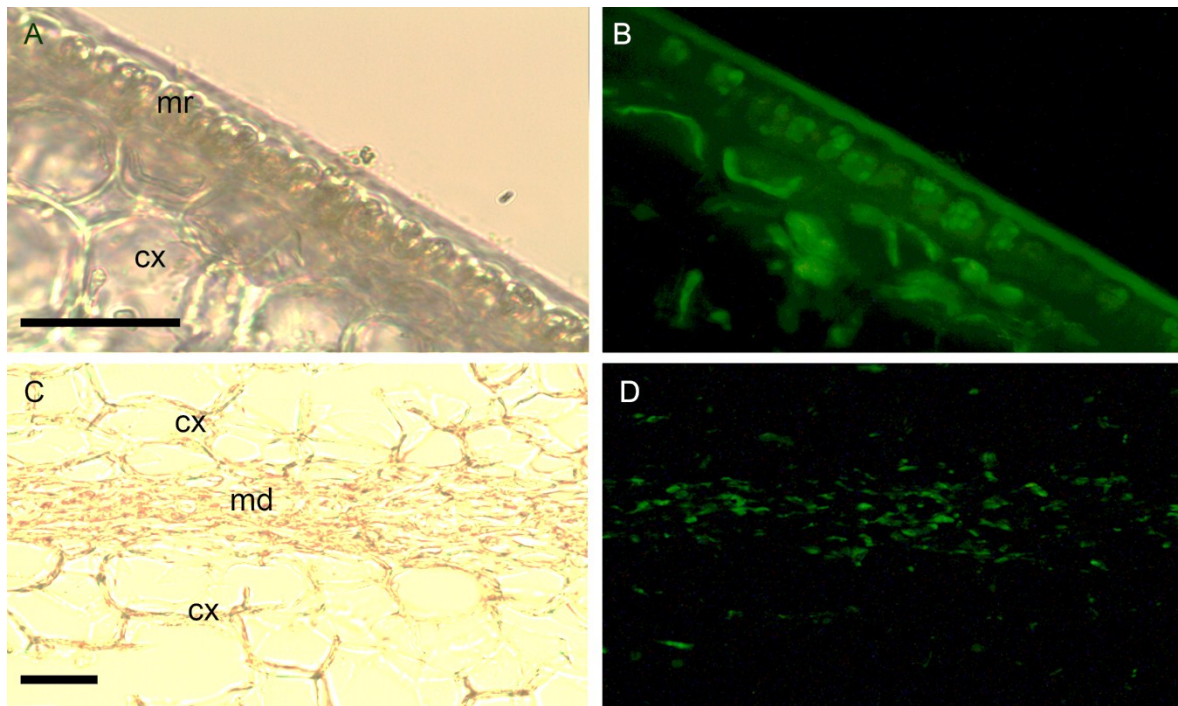

Figure S2. *Macrocyctis* blade. Meristoderm and cortex (A) Brightfield transmission, (B) B-FITC fluorescence. Medulla (C) Brightfield transmission, (D) B-FITC fluorescence. Meristoderm (mr), cortex (cx), medulla (md). Scalebars, 40  $\mu$ m.

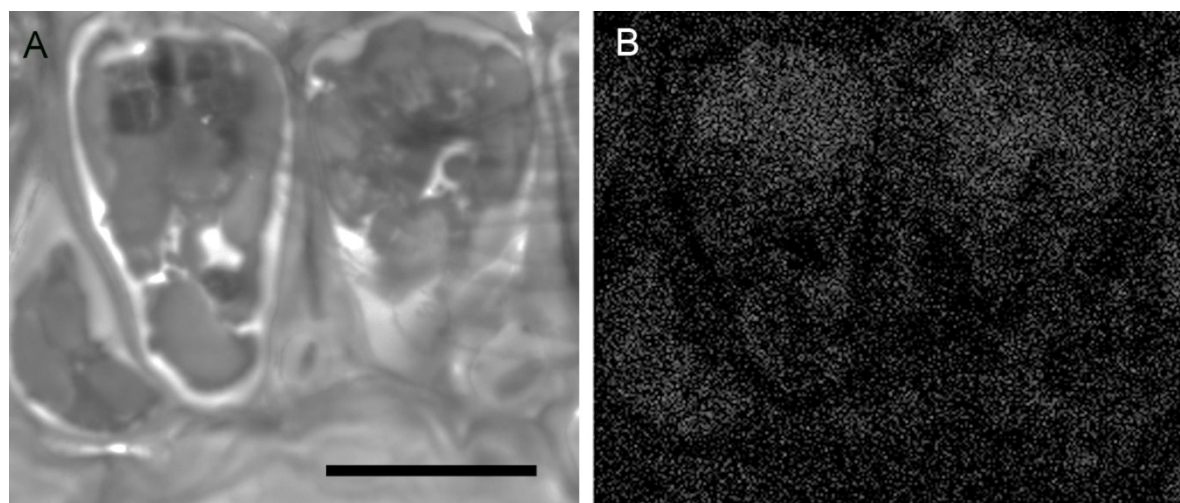

Figure S3. *Macrocystis* blade meristoderm. (A) STEM, (B) EDS. Scalebar, 5  $\mu\text{m}$ .
